# Supplementary material for: Human pericytes degrade diverse α-synuclein aggregates
Source: PubMed Central journal article supplement (PMC9674377; doi:10.1371/journal.pone.0277658), 2022-11-18

**AA 103-108**

1 2 3 4 5 6 7 8 9 10 11 12

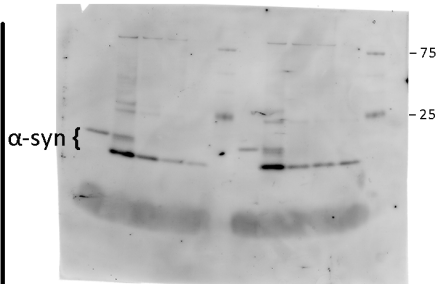

**AA 124-134**

1 2 3 4 5 6 7 8 9 10 11 12

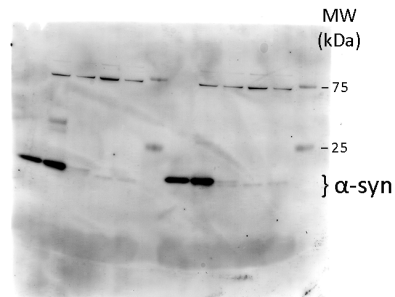

**GAPDH**

**loading control**

1 2 3 4 5 6 7 8 9 10 11 12 MW (kDa)

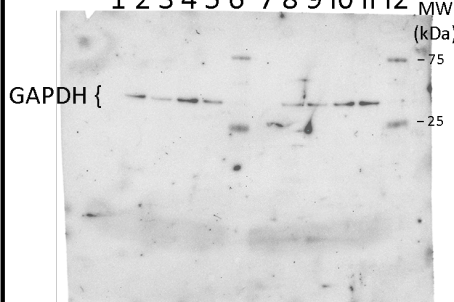

|         |                                     |
|---------|-------------------------------------|
| Lane 1  | Fibrils alpha syn pure              |
| Lane 2  | Protein extract Fibrils 4h+4 hours  |
| Lane 3  | Protein extract Fibrils 4h+24 hours |
| Lane 4  | Protein extract Fibrils 4h+14 days  |
| Lane 5  | Protein extract Fibrils 4h+21 days  |
| Lane 6  | Protein standard dual colour        |
| Lane 7  | Ribbons alpha syn pure              |
| Lane 8  | Protein extract Ribbons 4h+4 hours  |
| Lane 9  | Protein extract Ribbons 4h+24 hours |
| Lane 10 | Protein extract Ribbons 4h+14 days  |
| Lane 11 | Protein extract Ribbons 4h+21 days  |
| Lane 12 | Protein standard dual colour        |

**GAPDH**

**loading control**

1 2 3 4 5 6 7 8 9 10 11 12 MW (kDa)

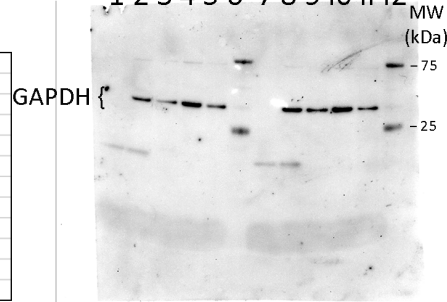

**GAPDH**

**loading control**

1 2 3 4 5 6 MW (kDa)

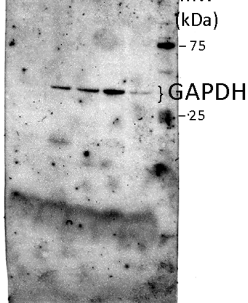

**AA 103-108**

1 2 3 4 5 6 MW (kDa)

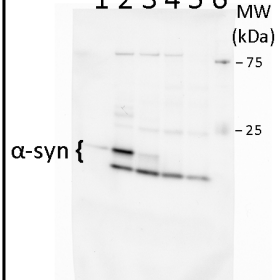

**AA 124-134**

1 2 3 4 5 6 MW (kDa)

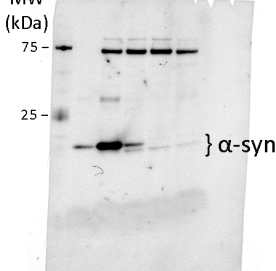

**GAPDH**

**loading control**

1 2 3 4 5 6 MW (kDa)

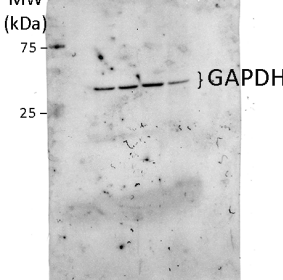

|        |                                       |
|--------|---------------------------------------|
| Lane 1 | P65 alpha syn pure                    |
| Lane 2 | Protein extract fibrils65 4h+4 hours  |
| Lane 3 | Protein extract fibrils65 4h+24 hours |
| Lane 4 | Protein extract fibrils65 4h+14 days  |
| Lane 5 | Protein extract fibrils65 4h+21 days  |
| Lane 6 | Protein standard dual colour          |

|        |                                       |
|--------|---------------------------------------|
| Lane 1 | Protein standard dual colour          |
| Lane 2 | P65 alpha syn pure                    |
| Lane 3 | Protein extract fibrils65 4h+4 hours  |
| Lane 4 | Protein extract fibrils65 4h+24 hours |
| Lane 5 | Protein extract fibrils65 4h+14 days  |
| Lane 6 | Protein extract fibrils65 4h+21 days  |

**GAPDH**

**loading control**

1 2 3 4 5 6 MW (kDa)

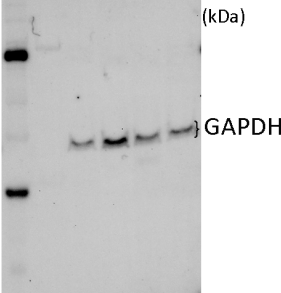

**AA 124-134**

1 2 3 4 5 6 MW (kDa)

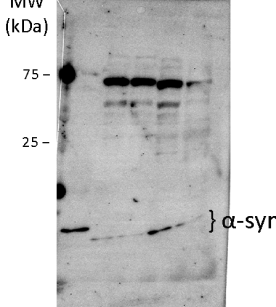

**GAPDH**

**loading control**

1 2 3 4 5 6 MW (kDa)

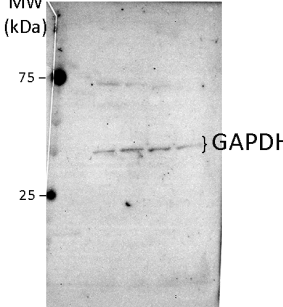

|        |                                               |
|--------|-----------------------------------------------|
| Lane 1 | Protein standard dual colour                  |
| Lane 2 | alpha syn monomer pure                        |
| Lane 3 | Protein extract alpha syn monomer 4h+4 hours  |
| Lane 4 | Protein extract alpha syn monomer 4h+24 hours |
| Lane 5 | Protein extract alpha syn monomer 4h+14 days  |
| Lane 6 | Protein extract alpha syn monomer 4h+21 hours |

**Fibrils and Ribbons**  
(used in Fig1F-J)

**Fibrils65**  
(used in Fig1G-J)

**alpha-syn monomer**

**Fibrils91**  
(used in Fig1G-J)

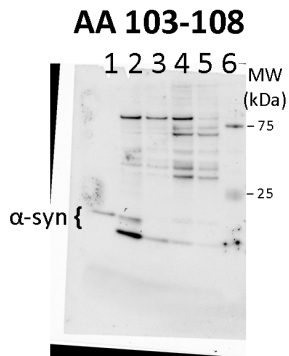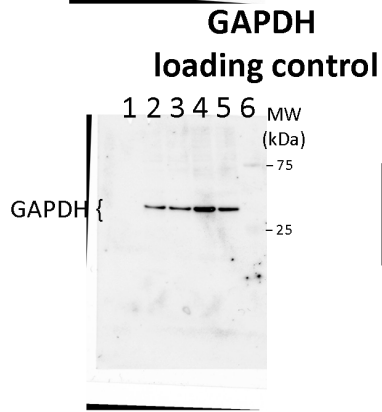

|        |                                       |
|--------|---------------------------------------|
| Lane 1 | alpha syn pure                        |
| Lane 2 | Protein extract fibrils91 4h+4 hours  |
| Lane 3 | Protein extract fibrils91 4h+24 hours |
| Lane 4 | Protein extract fibrils91 4h+14 days  |
| Lane 5 | Protein extract P91 4h+21 days        |
| Lane 6 | Protein standard dual colour          |

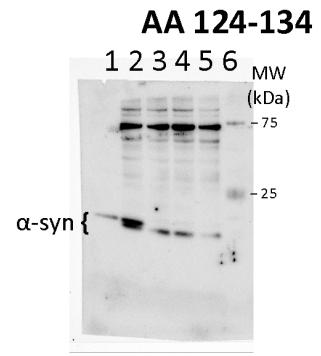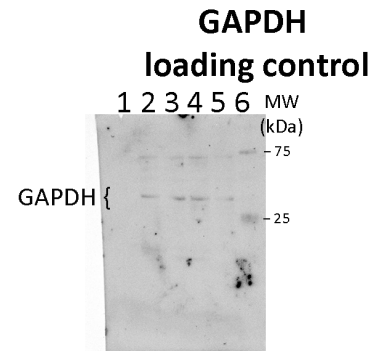

**Fibrils110 & no treatment control**  
(used in Fig1G-J)

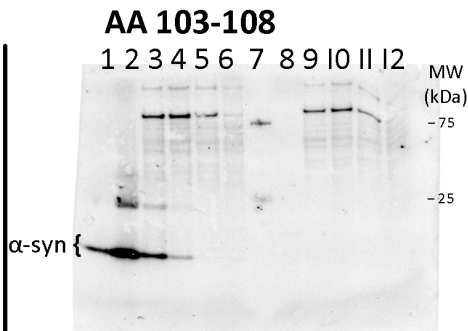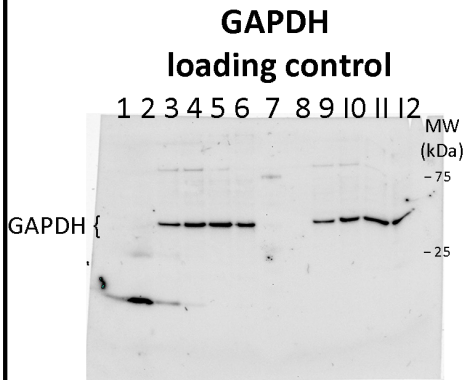

|         |                                          |
|---------|------------------------------------------|
| Lane 1  | Fibrils110 alpha syn pure                |
| Lane 2  | Protein extract fibrils110 4h+4 hours    |
| Lane 3  | Protein extract fibrils110 4h+24 hours   |
| Lane 4  | Protein extract fibrils110 4h+14 days    |
| Lane 5  | Protein extract fibrils110 4h+21 days    |
| Lane 6  | Protein standard dual colour             |
| Lane 7  | PBS                                      |
| Lane 8  | Protein extract no treatment 4h+4 hours  |
| Lane 9  | Protein extract no treatment 4h+24 hours |
| Lane 10 | Protein extract no treatment 4h+14 days  |
| Lane 11 | Protein extract no treatment 4h+21 days  |
| Lane 12 | Protein standard dual colour             |

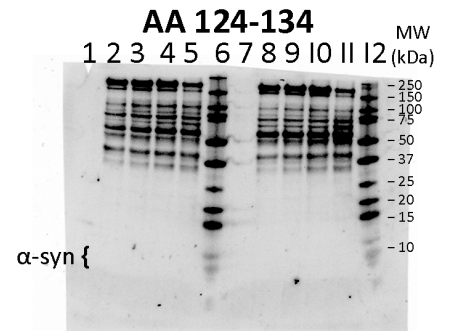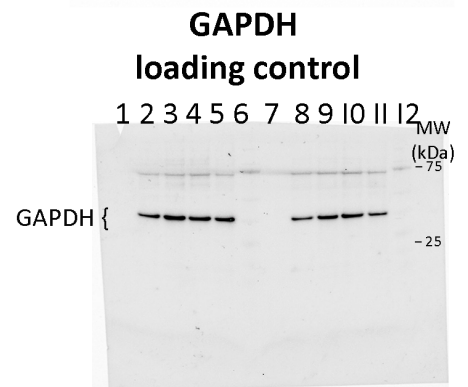

Supplement: pone.0277658.s003.pdf [file pone.0277658.s003.pdf]
